# Supplementary material for: Long-range transcriptional regulation by the p110 CUX1 homeodomain protein on the ENCODE array
Source: PubMed Central journal article supplement (PMC3770232; doi:10.1186/1471-2164-14-258), 2013-04-16
Supplement: 1471-2164-14-258-S2.pdf [file 1471-2164-14-258-S2.pdf]

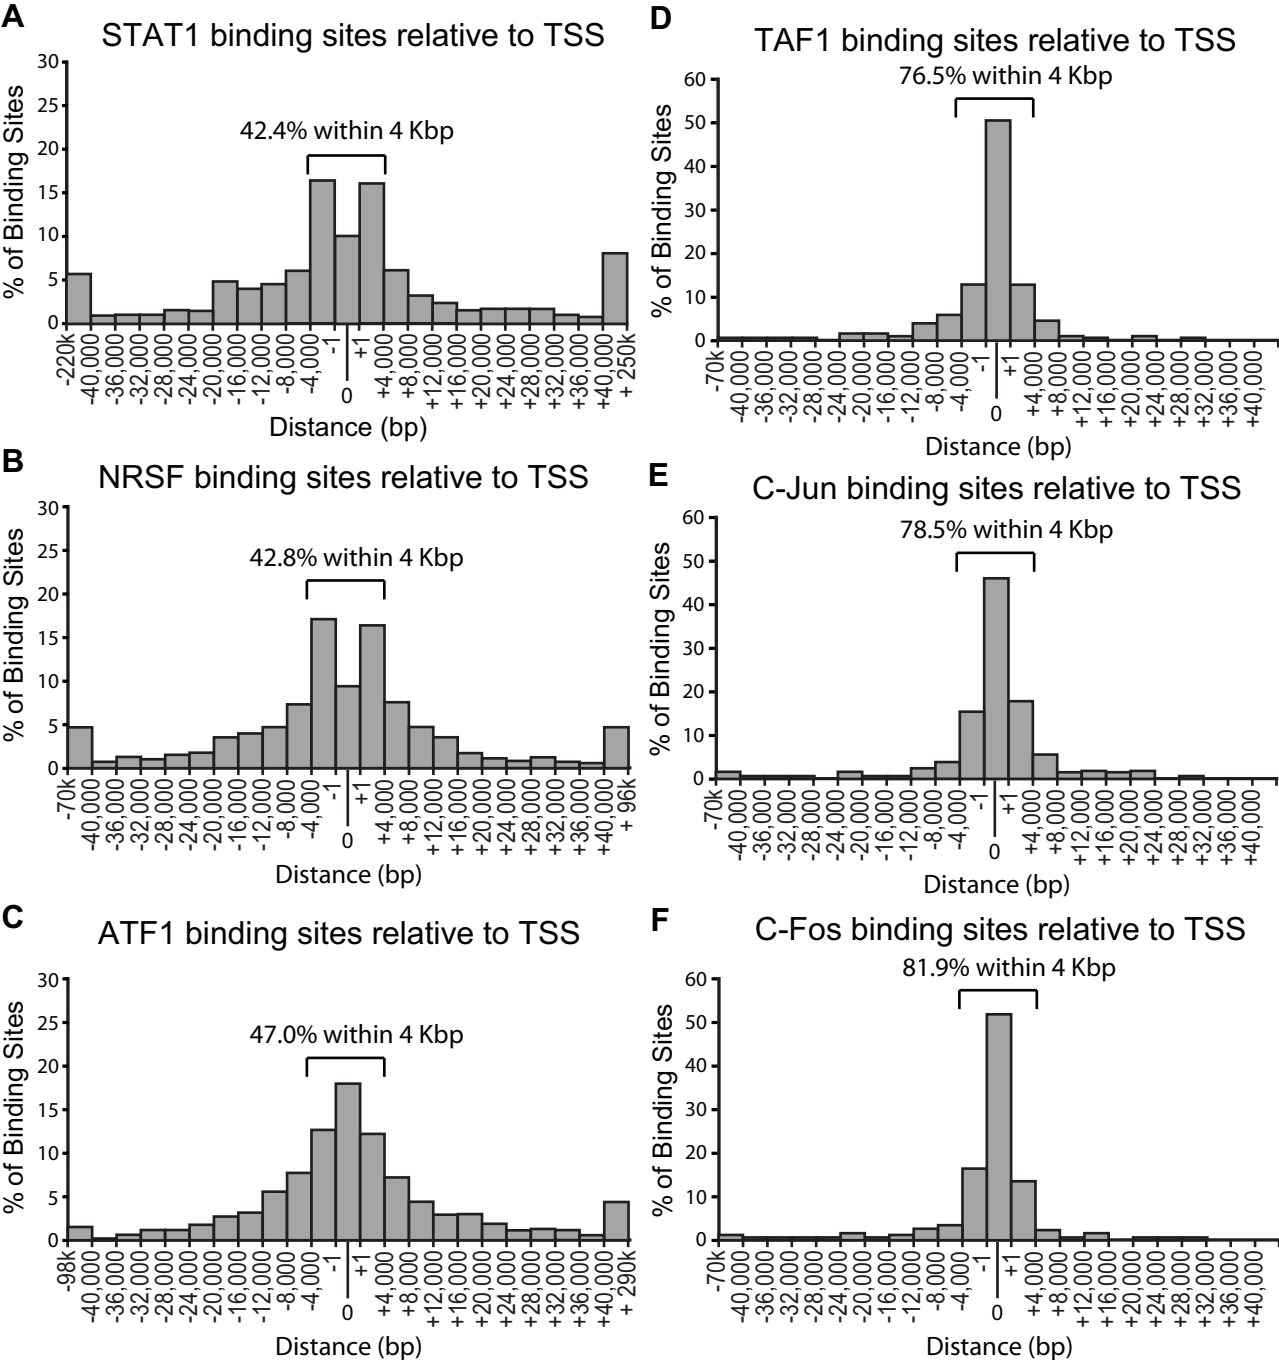

**Additional Figure 2** – Distribution of binding sites Relative to Transcription Start Sites

Percentage of binding sites located at various distances from the closest transcription start site for 6 different transcription factors.

The "0" column indicates genes where the binding site overlaps the start site.
